# Supplementary material for: Physiological and Transcriptomic Analyses of the Thermophilic, Aceticlastic Methanogen Methanosaeta thermophila Responding to Ammonia Stress
Source: PubMed Central journal article supplement (PMC4103522; doi:10.1264/jsme2.me14021), 2014-06-10
Supplement: 29_162_s1.pdf [file 29_162_s1.pdf]

1 Supplemental material

2  
3 **Physiological and Transcriptomic Analyses of the Thermophilic,**  
4 **Aceticlastic Methanogen *Methanosaeta thermophila* Responding to**  
5 **Ammonia Stress**

6  
7 Souichiro Kato<sup>1,2,3\*</sup>, Konomi Sasaki<sup>1,4</sup>, Kazuya Watanabe<sup>3,5</sup>, Isao Yumoto<sup>1</sup> and Yoichi  
8 Kamagata<sup>1,2</sup>

9  
10 <sup>1</sup>*Bioproduction Research Institute, National Institute of Advanced Industrial Science*  
11 *and Technology (AIST), 2-17-2-1 Tsukisamu-Higashi, Toyohira-ku, Sapporo, Hokkaido*  
12 *062-8517, Japan, <sup>2</sup>Division of Applied Bioscience, Graduate School of Agriculture,*  
13 *Hokkaido University, Kita-9 Nishi-9, Kita-ku, Sapporo, Hokkaido 060-8589, Japan,*  
14 <sup>3</sup>*Research Center for Advanced Science and Technology, The University of Tokyo, 4-6-1*  
15 *Komaba, Meguro-ku, Tokyo 153-8904, Japan, <sup>4</sup>Hokkaido High-Technology College,*  
16 *2-12-1 Megumino-kita, Eniwa, Hokkaido 061-1374, Japan, <sup>5</sup>School of Life Sciences,*  
17 *Tokyo University of Pharmacy and Life Sciences, 1432-1 Horinouchi, Hachioji, Tokyo*  
18 *192-0392, Japan*

19  
20 \*For correspondence. E-mail: s.katou@aist.go.jp; Tel.: (+81) 11 857 8968; FAX: (+81)  
21 11 857 8915

23 *Effects of ammonia on the pure cultures of T. phaeum PB and M. thermautotrophicus*  
24 *TM.*

25 The pure cultures of *T. phaeum* PB and *M. thermautotrophicus* TM were grown on  
26 40 mM pyruvate and 160 kPa of H<sub>2</sub>, respectively, with different concentrations of  
27 NH<sub>4</sub>Cl and their growth rates were determined and compared with that of *M.*  
28 *thermophila* PT (Fig. S1).

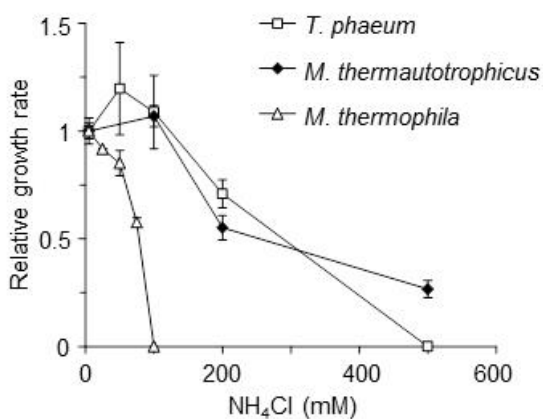

37 **Fig S1.** Effects of ammonia on growth rates of pure cultures of the three thermophilic  
38 strains. The relative growth rates of *T. phaeum* PB (open squares), *M.*  
39 *thermautotrophicus* TM (filled diamonds), and *M. thermophila* PT (open triangles) are  
40 plotted against NH<sub>4</sub>Cl concentrations. The growth rates were normalized against those  
41 of the control cultures (5 mM NH<sub>4</sub>Cl). Data are presented as the means of three  
42 independent cultures, and error bars represent standard deviations.

43

44 *Comparison of qRT-PCR and microarray data.*

45 Six genes for the central energy metabolism of *M. thermophila* PT (listed in the  
46 legend of Fig. S2) were selected for qRT-PCR analysis to examine if differential  
47 expression levels determined using microarrays were supported by qRT-PCR. Gene  
48 expression levels determined by qRT-PCR (copies per ng RNA) after the NH<sub>4</sub>Cl  
49 treatment were compared with those of control condition, and relative levels were  
50 plotted against the microarray data (Fig. S2). The PCR primers used for qRT-PCR are  
51 listed in Table S1.

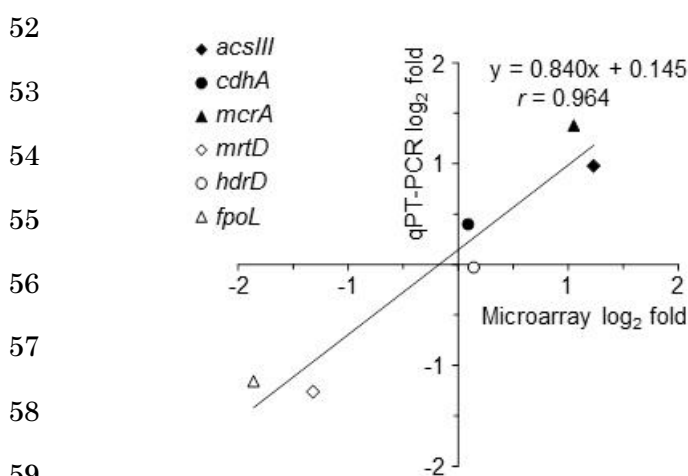

60

61 **Fig S2.** Comparison of qRT-PCR and microarray data. Filled diamonds, acetate  
62 CoA-ligase (acsIII, Mthe\_1194); filled circles, CO dehydrogenase/acetyl-CoA synthase  
63 complex alfa subunit (cdhA, Mthe\_0292); filled triangles, methyl-coenzyme M  
64 reductase alfa subunit (mcrA, Mthe\_0569); open diamonds, tetrahydromethanopterin  
65 S-methyltransferase D subunit (mrtD, Mthe\_1384); open circles, heterodisulfide  
66 reductase D subunit (hdrD, Mthe\_0980), open triangles, F<sub>420</sub>-H<sub>2</sub> dehydrogenase-like  
67 complex L subunit (Mthe\_1058). The approximation curve and the correlation  
68 coefficient (r) are given in the figure.

69

70 **Table S1.** qRT-PCR primers used in this study for amplifying *M. thermophila* PT 16S  
 71 rRNA and genes for methanogenesis.

| Primer name | Target gene   | Sequence (5' to 3')         |
|-------------|---------------|-----------------------------|
| Msaet_387F  | 16S rRNA      | GAT AAG GGG ACC TCG AGT GCT |
| Msaet_573R  | 16S rRNA      | GGC CGG CTA CAG ACC CT      |
| FpoL_1347F  | <i>fpoL</i>   | CGC TCT GAT TAC CAC AAG CA  |
| FpoL_1465R  | <i>fpoL</i>   | CGA CTG TCT CGT AGA AGC CC  |
| HdrD_1067F  | <i>hdrD</i>   | GGC AGA CAT CAT AGC AAG CA  |
| HdrD_1286R  | <i>hdrD</i>   | TTG CCT GTC ACT GTC TCC AG  |
| MtrD_341F   | <i>mtrD</i>   | TCC GAT CAC CGG ATA CTC TC  |
| MtrD_514R   | <i>mtrD</i>   | GGG CAC TCA GAG ATG GGT TA  |
| CdhA_1567F  | <i>cdhA</i>   | ACT ATC CAA ACG GCA CCA AG  |
| CdhA_1690R  | <i>cdhA</i>   | TGC CCT CTG CAT CAG TGT AG  |
| Acs3_193F   | <i>acsIII</i> | ACT GGT TCA AGC CGT ACA CC  |
| Acs3_437R   | <i>acsIII</i> | TTC TTG ACG CCC AGA CTC TT  |
| McrA_1085F  | <i>mcrA</i>   | CGT GGA GAA GTA CGG TGG AT  |
| McrA_1316R  | <i>mcrA</i>   | GAG AGG TAC CAG CCA GCA AG  |

72

73

74 *Up-regulation of chaperone genes under ammonia stress conditions.*

75 In the “post-translational modification, protein turnover and chaperones” category, 5  
76 out of 10 genes encoding molecular chaperones were up-regulated in response to  
77 ammonia stress in *M. thermophila* PT (Table S2). The up-regulation of chaperone genes  
78 by high ammonia concentrations was also reported for the mesophilic aceticlastic  
79 methanogen *Methanosarcina mazei* S-6 (1). In contrast, no chaperone genes were  
80 up-regulated in *M. thermautotrophicus* ΔH under ammonia stress conditions (2). Taken  
81 together, these findings indicate that the denaturation of intracellular proteins is one of  
82 the crucial consequences of ammonia stress in aceticlastic methanogens.

83

84

85 **Table S2.** Expression of genes encoding chaperone homologues in *M. thermophila* PT  
86 under ammonia-stress conditions.

| Locus tag                    | Gene/protein name                                     | Fold change <sup>a</sup> | p-value       |
|------------------------------|-------------------------------------------------------|--------------------------|---------------|
| Mthe_0045                    | Peptidylprolyl isomerase                              | 1.5                      | 3.8E-3        |
| <b>Mthe_0053<sup>b</sup></b> | <b>Molecular chaperone (small heat shock protein)</b> | <b>3.5</b>               | <b>2.4E-8</b> |
| Mthe_0574                    | Peptidylprolyl isomerase, FKBP-type                   | -1.6                     | 3.8E-7        |
| Mthe_0730                    | Chaperone protein DnaJ                                | 1.0                      | 2.2E-1        |
| <b>Mthe_0731</b>             | <b>Chaperone protein DnaK</b>                         | <b>2.0</b>               | <b>5.1E-5</b> |
| Mthe_0732                    | GrpE protein                                          | -1.7                     | 1.8E-5        |
| <b>Mthe_0805</b>             | <b>Heat shock protein Hsp20</b>                       | <b>3.5</b>               | <b>2.1E-8</b> |
| <b>Mthe_0852</b>             | <b>Heat shock protein HtpX</b>                        | <b>2.2</b>               | <b>4.1E-7</b> |
| Mthe_1547                    | Peptidylprolyl isomerase, FKBP-type                   | 1.8                      | 1.7E-4        |
| <b>Mthe_1631</b>             | <b>Heat shock protein Hsp20</b>                       | <b>6.4</b>               | <b>7.3E-6</b> |

87 a. Fold change in negative values indicate down-regulation under the ammonia stress conditions.

88 b. Bold letters indicate significantly upregulated genes (Fold > 2,  $p < 0.01$ ).

89

90 *Up-regulation of genes for antioxidant enzymes under ammonia stress conditions.*

91 In the “post-translational modification, protein turnover and chaperones” category,  
 92 10 out of 16 genes, which encode homologues of antioxidant enzymes were  
 93 up-regulated in *M. thermophila* PT in response to ammonia stress (Table S3). The  
 94 up-regulation of antioxidant enzyme genes was also reported in ammonia-stressed cells  
 95 of *M. thermautotrophicus* ΔH (2). Considering that the depletion of methanogenesis  
 96 substrates, such as H<sub>2</sub>, also induces the overexpression of antioxidant enzyme genes in  
 97 *M. thermautotrophicus* ΔH (2), the suppression of methanogenesis induced by ammonia  
 98 stress and concomitant undersupply of reducing equivalents required for the reduction  
 99 of diverse oxidative agents may cause oxidative stress for methanogens.

100

101 **Table S3.** Expression of genes encoding antioxidant enzymes in *M. thermophila* PT  
 102 under ammonia-stress conditions.

| Locus tag                    | Gene/Protein name                              | Fold change <sup>a</sup> | <i>p</i> -value |
|------------------------------|------------------------------------------------|--------------------------|-----------------|
| <b>Mthe_0117<sup>b</sup></b> | <b>Rubredoxin-type Fe(Cys)4 protein</b>        | <b>6.1</b>               | <b>5.4E-8</b>   |
| Mthe_0245                    | Flavoprotein                                   | 1.1                      | 2.3E-3          |
| Mthe_0493                    | Alkylhydroperoxidase like protein, AhpD family | 1.0                      | 3.1E-1          |
| <b>Mthe_0685</b>             | <b>Superoxide dismutase</b>                    | <b>2.7</b>               | <b>1.1E-7</b>   |
| <b>Mthe_0707</b>             | <b>Glutaredoxin</b>                            | <b>2.0</b>               | <b>2.7E-6</b>   |
| <b>Mthe_0711</b>             | <b>Thioredoxin</b>                             | <b>2.0</b>               | <b>1.3E-5</b>   |
| <b>Mthe_0743</b>             | <b>Rubrerythrin</b>                            | <b>2.2</b>               | <b>1.1E-8</b>   |
| Mthe_0782                    | Alkylhydroperoxidase like protein, AhpD family | -1.6                     | 2.7E-3          |
| <b>Mthe_0907</b>             | <b>Rubredoxin-type Fe(Cys)4 protein</b>        | <b>2.7</b>               | <b>5.7E-7</b>   |
| <b>Mthe_0908</b>             | <b>Glutaredoxin</b>                            | <b>2.3</b>               | <b>4.4E-7</b>   |
| Mthe_1133                    | Thioredoxin                                    | -1.0                     | 2.7E-1          |
| Mthe_1150                    | Thioredoxin-disulfide reductase                | 1.8                      | 1.5E-9          |
| Mthe_1166                    | Flavoprotein                                   | 1.5                      | 4.1E-3          |
| <b>Mthe_1245</b>             | <b>Rubredoxin-type Fe(Cys)4 protein</b>        | <b>3.9</b>               | <b>2.1E-6</b>   |
| <b>Mthe_1416</b>             | <b>Peroxidase</b>                              | <b>3.9</b>               | <b>6.6E-9</b>   |
| <b>Mthe_1697</b>             | <b>Thioredoxin-like protein</b>                | <b>2.6</b>               | <b>4.1E-8</b>   |

103 a. Fold change in negative values indicate down-regulation under the ammonia stress conditions.

104 b. Bold letters indicate significantly upregulated genes (Fold > 2, *p* < 0.01).

105

106 *The expression of genes for the central energy metabolism under ammonia stress*  
107 *conditions.*

108 The expression pattern of the genes involved in the central energy metabolism  
109 varied from gene to gene (Fig. S3). For example, the genes encoding acetate-CoA ligase  
110 (Acs) and methyl-CoM reductase (Mcr) were significantly up-regulated in cells exposed  
111 to ammonia, whereas the genes for F<sub>420</sub>-H<sub>2</sub> dehydrogenase-like complex (Fpo), ATP  
112 synthase (Atp), and two subunits of tetrahydromethanopterin S-methyltransferase (Mtr)  
113 were significantly down-regulated. A similar phenomenon was reported for the  
114 transcriptome analysis of *M. thermautotrophicus* ΔH: genes encoding a number of  
115 methanogenic enzymes, including Mcr, were up-regulated in response to ammonia  
116 stress, while the genes for Atp were down-regulated (2). One plausible explanation is  
117 that the inhibition of certain enzymatic activities causes the accumulation of  
118 intermediate compounds that affect the gene expression of various metabolic enzymes.  
119 The inhibition of certain methanogenic enzyme(s) (as suggested by the non-growing  
120 culture experiments) causes accumulation of the intermediates (the substrate[s] for the  
121 inhibited enzyme[s]) of the methanogenic pathway. Also it is conceivable that  
122 accumulation of such intermediate compounds cause up- (or down-)regulation of genes  
123 for the down- (or up-)stream reactions. This assumption requires further physiological  
124 and molecular biological experiments, for example, (partial) purification of  
125 methanogenic enzymes and measurements of the enzymatic activities under various  
126 concentrations of ammonia, to confirm it.

127

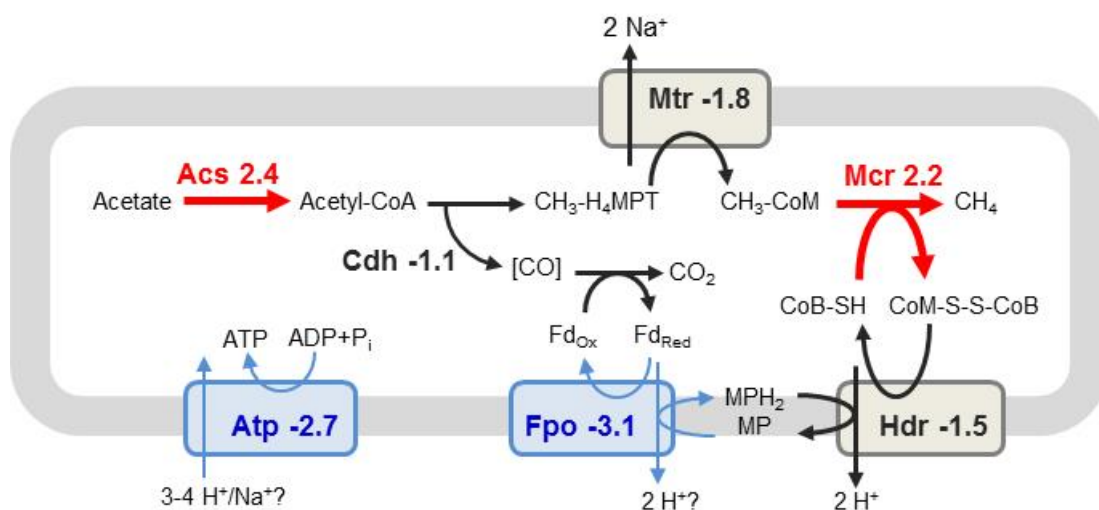

128

129 **Fig. S3.** Schematic image of central energy metabolism of *M. thermophila* PT and gene  
 130 expression profiles of the respective enzymes. Enzyme abbreviations and fold changes  
 131 in expression (ammonia stress vs. control) are shown in bold letters. Red and blue  
 132 letters indicate significantly up- or down-regulated genes (Fold > 2 or < -2, p < 0.01),  
 133 respectively, under ammonia-stress conditions. Acs, acetate-CoA ligase; Cdh, CO  
 134 dehydrogenase/acetyl-CoA synthase; Mtr, tetrahydromethanopterin S-methyltransferase;  
 135 Mcr, methyl-CoM reductase; Hdr, heterodisulfide reductase; Fpo, F<sub>420</sub>H<sub>2</sub>  
 136 dehydrogenase-like complex; Atp, ATP synthase; H<sub>4</sub>MPT, tetrahydromethanopterin; P<sub>i</sub>,  
 137 inorganic phosphate; Fd<sub>Ox</sub> and Fd<sub>Red</sub>, oxidized and reduced ferredoxin, respectively; and  
 138 MP and MPH<sub>2</sub>, oxidized and reduced methanophenazine, respectively.

139



140 *Up-regulation of genes for inorganic ion transport under ammonia stress conditions.*

141 Ammonia stress induced the expression of numerous genes in the “inorganic ion  
142 transport and metabolism” category, with 25 out of a total of 96 genes being  
143 significantly up-regulated in *M. thermophila* PT (Table S4). Among the 25 up-regulated  
144 genes, 18 genes were annotated as periplasmic or membrane components of putative  
145 ABC-type transporters, although the substrate specificities of these components are  
146 largely unknown. These findings are consistent with the speculation that ammonia stress  
147 causes disturbance in intracellular cation balances (3, 4).

148

149 **Table S4.** *M. thermophila* PT genes of the “inorganic ion transport and metabolism”  
 150 category that were significantly up-regulated under ammonia-stress conditions.

| Locus tag | Gene/Protein name                           | Fold change | <i>p</i> -value |
|-----------|---------------------------------------------|-------------|-----------------|
| Mthe_0084 | ammonium transporter                        | 2.1         | 1.1E-4          |
| Mthe_0118 | Ferritin, Dps family protein                | 6.0         | 5.0E-8          |
| Mthe_0296 | hypothetical protein                        | 3.6         | 1.2E-5          |
| Mthe_0342 | ABC-type transporter, periplasmic component | 2.1         | 3.4E-4          |
| Mthe_0344 | ABC-type transporter, periplasmic component | 2.5         | 6.5E-6          |
| Mthe_0442 | ABC-type transporter, periplasmic component | 2.8         | 7.6E-7          |
| Mthe_0443 | ABC-type transporter, periplasmic component | 2.8         | 3.3E-6          |
| Mthe_0444 | ABC-type transporter, periplasmic component | 8.9         | 4.1E-8          |
| Mthe_0448 | ABC-type transporter, periplasmic component | 4.8         | 6.7E-7          |
| Mthe_0528 | ABC-type transporter, periplasmic component | 2.1         | 9.9E-5          |
| Mthe_0685 | superoxide dismutase                        | 2.7         | 1.1E-7          |
| Mthe_0689 | rhodanese-related sulfurtransferase         | 10.3        | 3.6E-6          |
| Mthe_0858 | ABC-type transporter, permease components   | 2.8         | 5.7E-5          |
| Mthe_0859 | ABC-type transporter, permease components   | 4.2         | 1.5E-7          |
| Mthe_0905 | heavy metal translocating P-type ATPase     | 2.1         | 1.4E-6          |
| Mthe_0972 | ABC-type transporter, periplasmic component | 3.9         | 6.8E-6          |
| Mthe_1009 | ATPase, P-type (transporting)               | 4.2         | 2.2E-7          |
| Mthe_1042 | ABC-type transporter, periplasmic component | 4.3         | 1.3E-6          |
| Mthe_1043 | adenylylsulfate kinase                      | 2.6         | 1.4E-8          |
| Mthe_1185 | ABC-type transporter, periplasmic component | 2.4         | 1.2E-6          |
| Mthe_1206 | Carbohydrate-binding and sugar hydrolysis   | 2.4         | 6.1E-5          |
| Mthe_1269 | TrkA-N domain protein                       | 2.7         | 6.4E-6          |
| Mthe_1347 | citrate transporter                         | 2.1         | 1.1E-4          |
| Mthe_1480 | phosphate binding protein                   | 23.7        | 2.9E-9          |
| Mthe_1626 | periplasmic copper-binding protein          | 3.1         | 1.6E-5          |

151

152

153 **REFERENCES FOR SUPPLEMENTAL**

- 154 1. Lange, M., A. J. L. Macario, B. K. Ahring, and E. Conway de Macario. 1997.  
155 Increased transcripts of the *dnaK* locus genes in *Methanosarcina mazei* S-6 exposed  
156 to supraoptimal concentrations of ammonia. FEMS Microbiol. Lett. 152:379-384.
- 157 2. Kato, S., T. Kosaka, and K. Watanabe. 2008. Comparative transcriptome analysis of  
158 responses of *Methanothermobacter thermautotrophicus* to different environmental  
159 stimuli. Environ. Microbiol. 10:893-905.
- 160 3. Sprott, G. D., K. M. Shaw, and K. F. Jarrell. 1984. Ammonia/potassium exchange in  
161 methanogenic bacteria. J. Biol. Chem. 259:12602-12608.
- 162 4. Wittmann, C., A. P. Zeng, and W. D. Deckwer. 1995. Growth inhibition by ammonia  
163 and use of a pH-controlled feeding strategy for the effective cultivation of  
164 *Mycobacterium chlorophenolicum*. Appl. Microbiol. Biotechnol. 44:519-525.
